# Supplementary material for: Food Sources and Potential Determinants of Dietary Vitamin C Intake in Chinese Adults: A Cross-Sectional Study
Source: PubMed Central journal article supplement (PMC5872738; doi:10.3390/nu10030320), 2018-03-07
Supplement: nutrients-10-00320-s001.pdf [file nutrients-10-00320-s001.pdf]

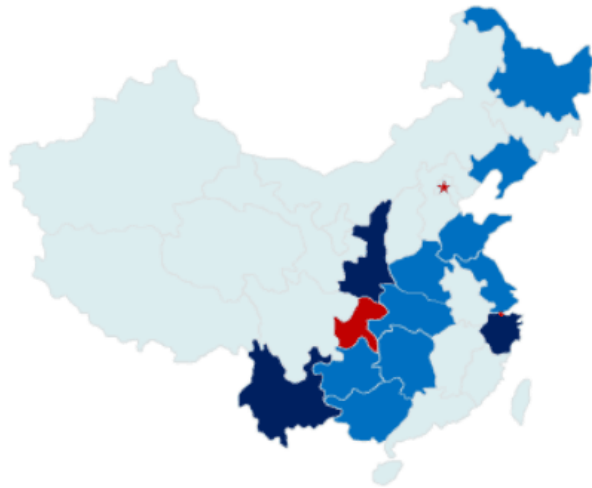

**Figure S1.** The geographic map of China to show the covered provinces (municipalities) in the China Nutritional Transition Cohort Study. The China Nutritional Transition Cohort Study conducted in 2015 is based on the China Health and Nutrition Survey, an ongoing and longitudinal study across nine diverse provinces (Heilongjiang, Liaoning, Shandong, Henan, Jiangsu, Hubei, Hunan, Guizhou, and Guangxi in light blue) and eight rounds of survey between 1989 and 2009. In 2011, the three largest municipal cities (Beijing in red pentagram, Shanghai in red spot, and Chongqing in red area) were added. An additional three provinces (Zhejiang, Shanxi, and Yunnan in dark blue) were included in 2015.

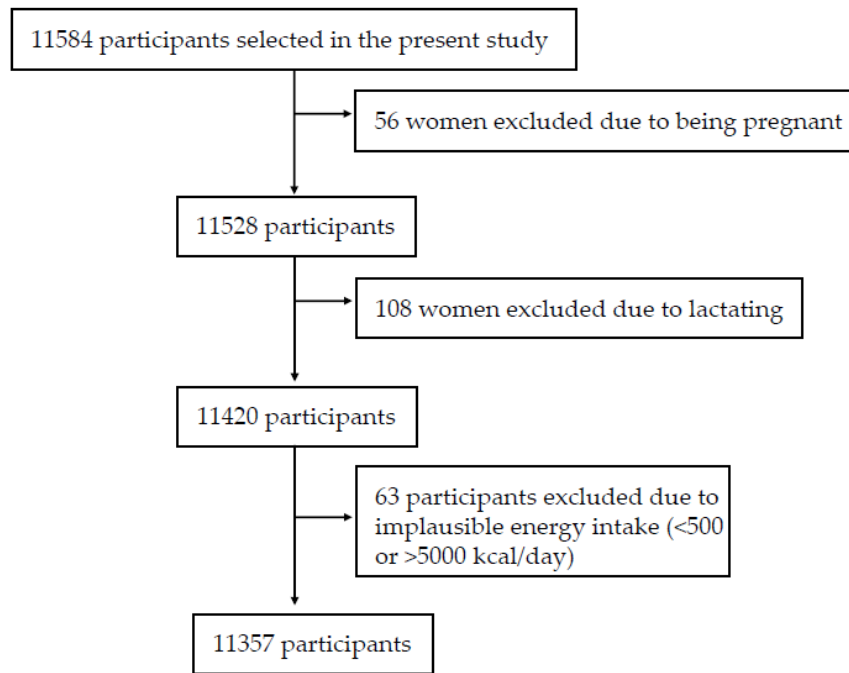

**Figure S2.** Flow chart of participants for the estimation of dietary vitamin C intake, and its food sources and potential determinants in Chinese adults using cross-sectional data from 2015 China Nutritional Transition Cohort Study.

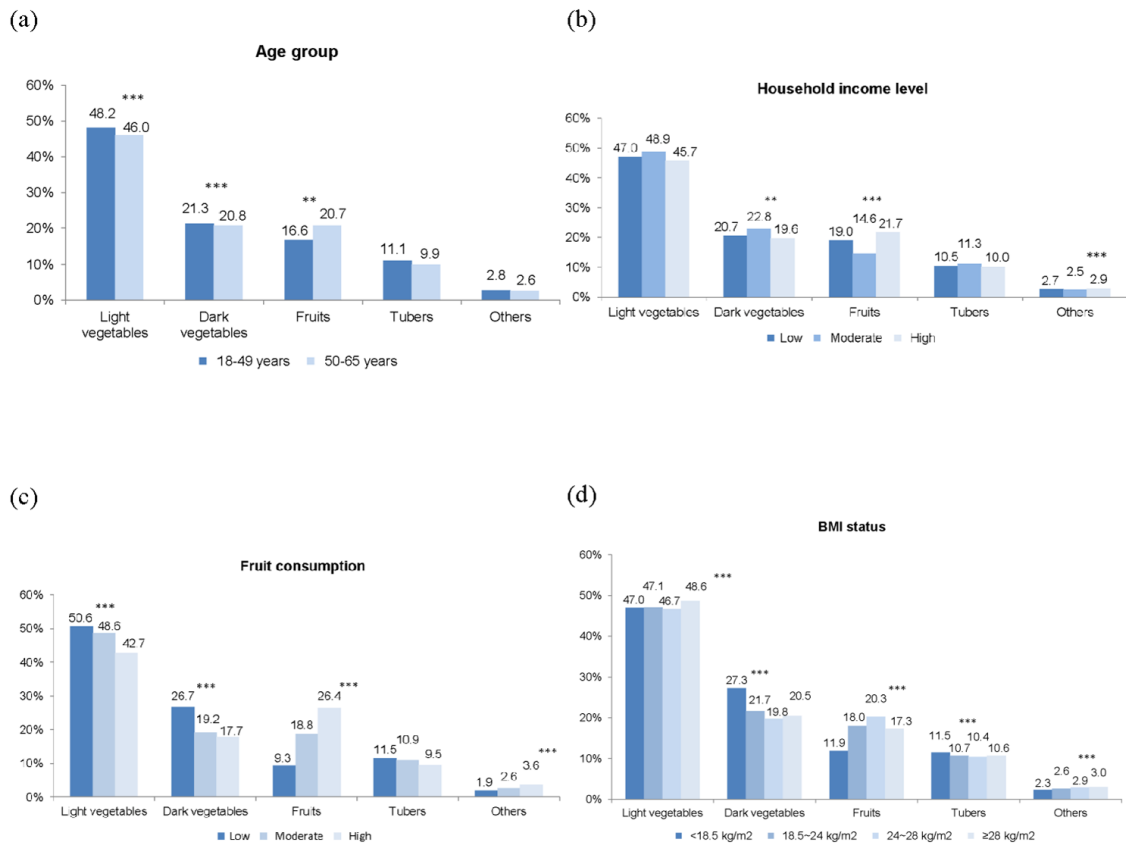

**Figure S3.** Contribution percentage of food sources to total vitamin C intake by socio-demographic factors. Subgroups by age (a), household income level (b), fruit consumption (c), and BMI status (d). \*\* $p < 0.01$ , and \*\*\* $p < 0.001$  indicate significant differences in the distribution of contribution percentage of food sources to total vitamin C intake by socio-demographic factors by Wilcoxon rank-sum test or Kruskal-Wallis analysis. BMI, body mass index.

Table S1. The breakdown of fruit and vegetables contributing to dietary vitamin C intake.

| Group                             | Sub-group                                | Examples of food                          |
|-----------------------------------|------------------------------------------|-------------------------------------------|
| Fruit and fruit products          | Kernel fruit                             | apple, pear                               |
|                                   | Drupe fruit                              | date, peach                               |
|                                   | Berry                                    | grape, pomegranate, persimmon             |
|                                   | Orange fruit                             | orange, pomelo                            |
|                                   | Tropic fruit                             | banana, mango                             |
|                                   | Melons                                   | watermelon, casaba                        |
| Vegetables and vegetable products | Root vegetable                           | carrot, daikon, turnip                    |
|                                   | Leguminous vegetable and sprout          | kidney bean, yardlong, pea greens         |
|                                   | Cucurbitaceous and solanaceous vegetable | cucumber, zucchini, eggplant              |
|                                   | Allium vegetable                         | garlic stalk, scallion, garlic bulb       |
|                                   | Stem, leafy, and flowering vegetable     | bok choy, cauliflower, cabbage            |
|                                   | Aquatic vegetable                        | lotus root, wildrice stem, water chestnut |
|                                   | Tuber                                    | taro, ginger, yam                         |
| Wild vegetable                    | common spiderflower, balloonflower       |                                           |

Table S2 Association of dietary vitamin C intake with socio-demographic factors using quantile regression model.

| Independent variables       | Quantile regression estimates |                                |                                |                                |                                |
|-----------------------------|-------------------------------|--------------------------------|--------------------------------|--------------------------------|--------------------------------|
|                             | P <sub>10</sub> (23.6 mg/day) | P <sub>25</sub> (40.3 mg/day)  | P <sub>50</sub> (65.4 mg/day)  | P <sub>75</sub> (101.7 mg/day) | P <sub>90</sub> (145.9 mg/day) |
| Gender                      |                               |                                |                                |                                |                                |
| male                        | -0.89 (-2.74, 0.96)           | <b>-2.96 (-5.10, -0.83)</b>    | <b>-4.46 (-7.12, -1.79)</b>    | -3.46 (-7.24, 0.32)            | -3.17 (-10.18, 3.85)           |
| Education level             |                               |                                |                                |                                |                                |
| primary school and below    | <b>-2.41 (-4.34, -0.48)</b>   | <b>-3.15 (-5.28, -1.02)</b>    | -0.99 (-3.78, 1.79)            | 2.22 (-1.26, 5.69)             | 2.57 (-4.45, 9.60)             |
| middle school               | -1.33 (-2.94, 0.27)           | -1.59 (-3.64, 0.46)            | 2.32 (-0.50, 5.13)             | <b>7.41 (4.00, 10.83)</b>      | <b>6.35 (0.20, 12.49)</b>      |
| Residence area              |                               |                                |                                |                                |                                |
| city                        | 0.17 (-2.14, 2.47)            | -0.61 (-3.07, 1.86)            | 0.54 (-2.31, 3.40)             | <b>5.41 (1.39, 9.44)</b>       | <b>13.87 (5.93, 21.80)</b>     |
| suburban                    | <b>5.09 (2.88, 7.29)</b>      | <b>7.96 (5.31, 10.61)</b>      | <b>10.98 (7.73, 14.24)</b>     | <b>17.86 (13.89, 21.84)</b>    | <b>18.79 (11.94, 25.64)</b>    |
| town or county capital city | -0.69 (-2.51, 1.12)           | -0.19 (-1.84, 1.47)            | <b>-3.55 (-6.40, -0.70)</b>    | -0.98 (-4.47, 2.51)            | 0.25 (-6.50, 7.01)             |
| Geographic location         |                               |                                |                                |                                |                                |
| north                       | -0.66 (-2.00, 0.68)           | <b>-2.53 (-4.20, -0.85)</b>    | <b>-2.71 (-4.83, -0.59)</b>    | <b>-3.48 (-6.30, -0.66)</b>    | -4.22 (-9.66, 1.22)            |
| Smoking status              |                               |                                |                                |                                |                                |
| never smoker                | 1.01 (-1.24, 3.26)            | 0.22 (-2.30, 2.73)             | 0.48 (-2.77, 3.74)             | -4.13 (-8.34, 0.09)            | 1.07 (-6.50, 8.64)             |
| former smoker               | 1.13 (-5.58, 7.83)            | 2.64 (-3.12, 8.39)             | 5.92 (-2.65, 14.49)            | 2.45 (-7.25, 12.15)            | -4.35 (-24.59, 15.90)          |
| Alcohol intake              |                               |                                |                                |                                |                                |
| no                          | 0.28 (-1.50, 2.06)            | -1.44 (-3.63, 0.76)            | <b>-3.07 (-5.86, -0.28)</b>    | 1.03 (-2.53, 4.58)             | 1.16 (-5.32, 7.63)             |
| Vegetable consumption       |                               |                                |                                |                                |                                |
| low                         | <b>-4.49 (-6.07, -2.91)</b>   | <b>-4.22 (-6.01, -2.43)</b>    | <b>-8.71 (-11.42, -6.01)</b>   | <b>-12.18 (-15.48, -8.89)</b>  | <b>-18.98 (-25.11, -12.84)</b> |
| moderate                    | -1.58 (-3.34, 0.17)           | -1.47 (-3.41, 0.47)            | <b>-7.13 (-9.90, -4.36)</b>    | <b>-7.07 (-10.82, -3.32)</b>   | <b>-7.78 (-14.28, -1.28)</b>   |
| Total daily energy intake   |                               |                                |                                |                                |                                |
| low                         | <b>-9.81 (-11.37, -8.25)</b>  | <b>-15.68 (-17.54, -13.83)</b> | <b>-27.07 (-29.59, -24.55)</b> | <b>-39.87 (-43.31, -36.42)</b> | <b>-51.65 (-57.64, -45.67)</b> |
| moderate                    | <b>-3.68 (-5.50, -1.85)</b>   | <b>-8.53 (-10.33, -6.72)</b>   | <b>-15.42 (-18.09, -12.75)</b> | <b>-24.42 (-27.82, -21.02)</b> | <b>-29.09 (-35.72, -22.45)</b> |

Data are expressed as regression estimate (95% Confidence Interval) of quantile regression model by adjustment for gender, educational level, residence area, geographic location, smoking status, alcohol intake, vegetable consumption and total daily energy intake. Results in bold mean significant at p<0.05.
